# Supplementary material for: LRP1 influences trafficking of N-type calcium channels via interaction with the auxiliary α2δ-1 subunit
Source: PubMed Central journal article supplement (PMC5335561; doi:10.1038/srep43802), 2017-03-03

**LRP1 influences trafficking of N-type calcium channels via interaction with the auxiliary  $\alpha_2\delta$ -1 subunit**

Ivan Kadurin, Simon W Rothwell, Beatrice Lana, Manuela Nieto-Rostro and Annette C Dolphin

Supplementary Information

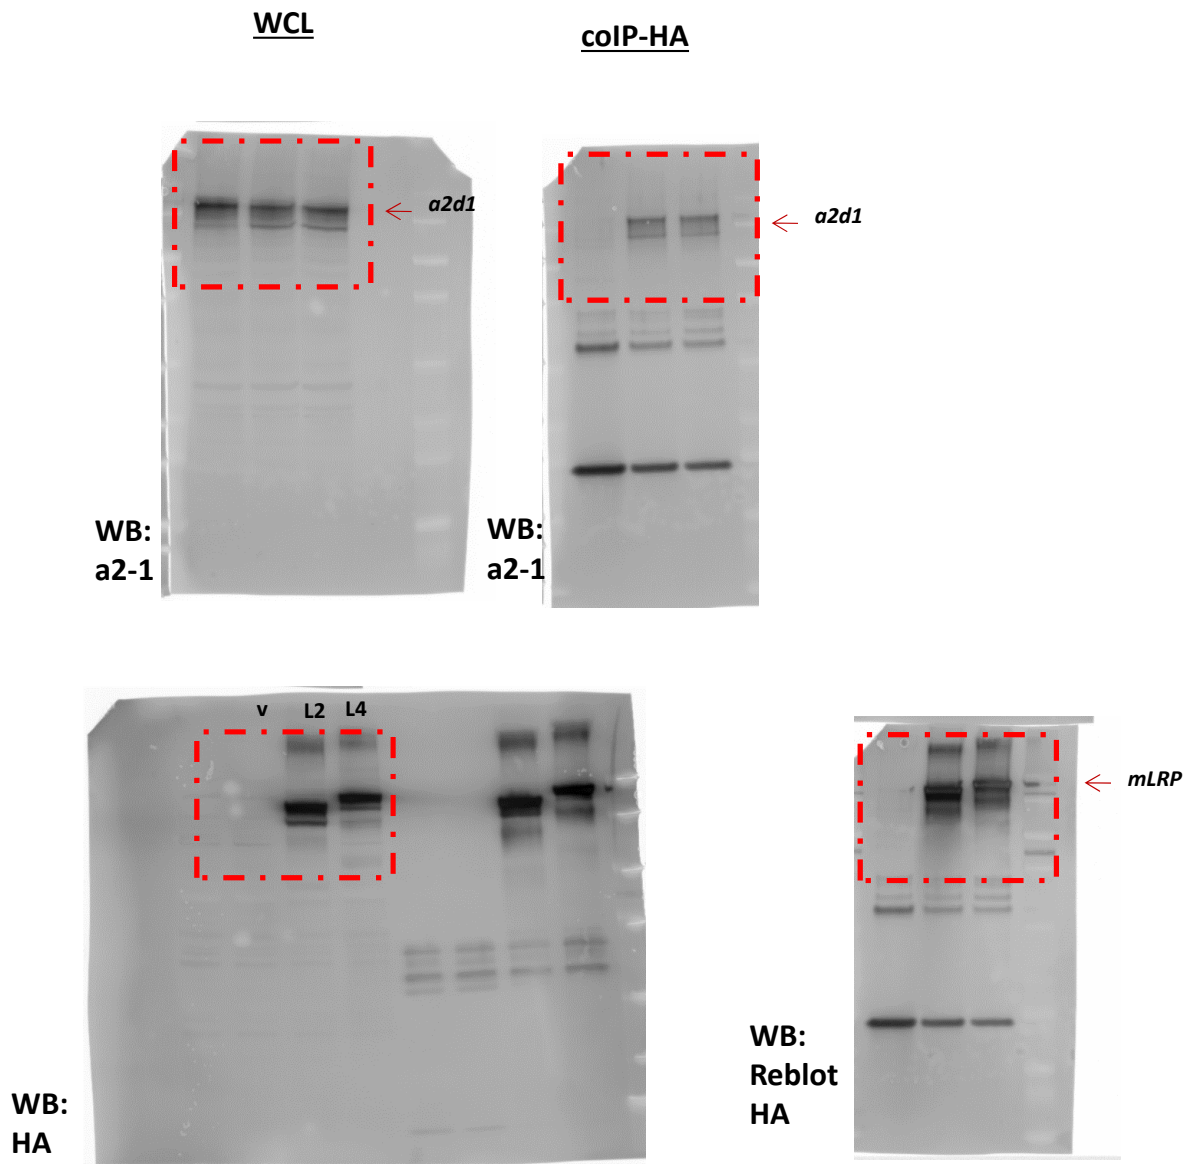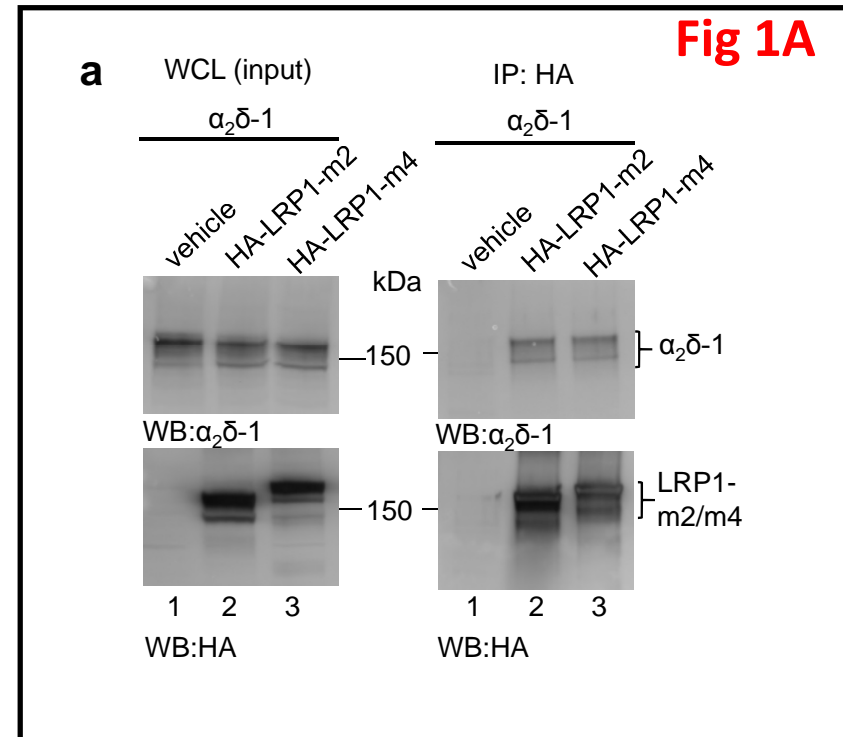

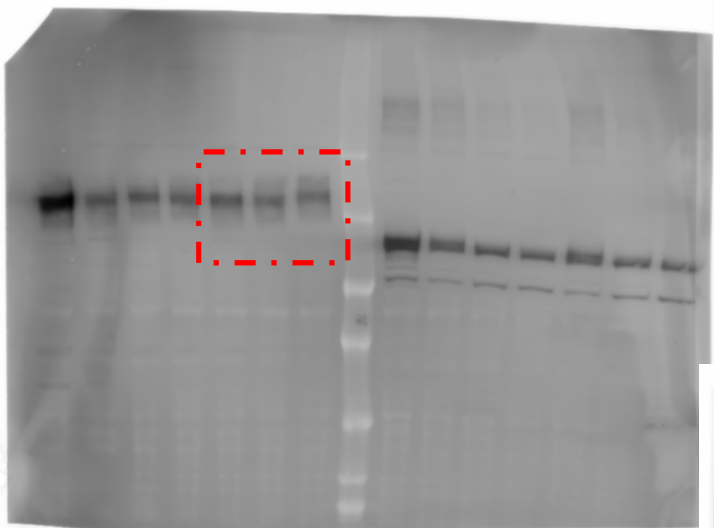

WB: HA

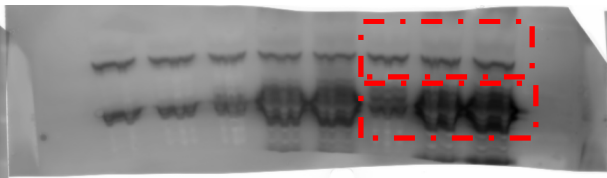

WB: Akt and RAP reblot

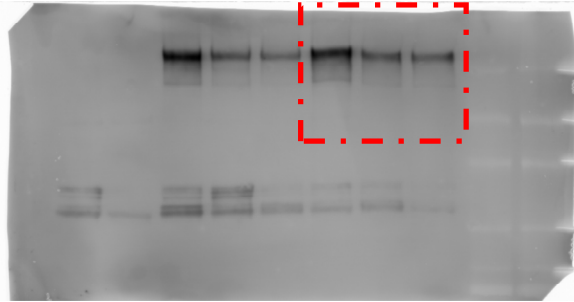

WB: HA

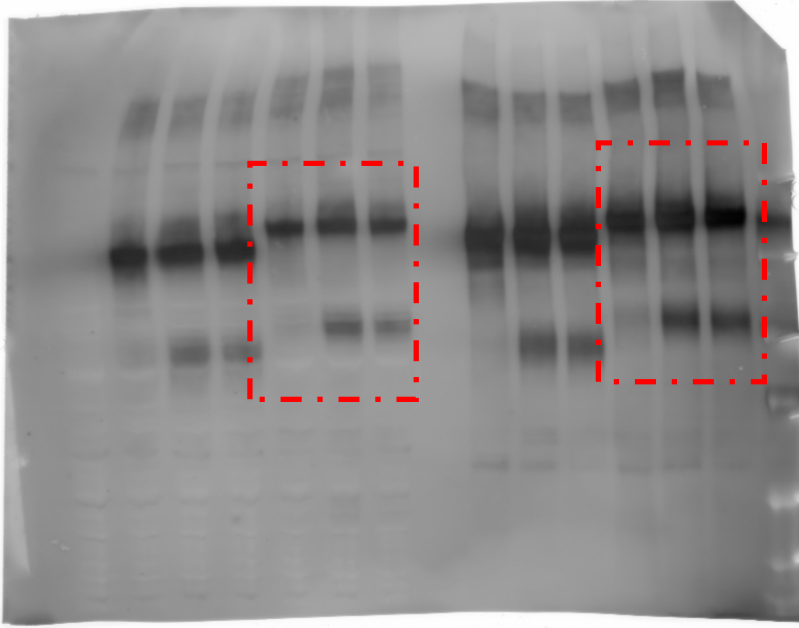

WB: FLAG

**Fig 1B**

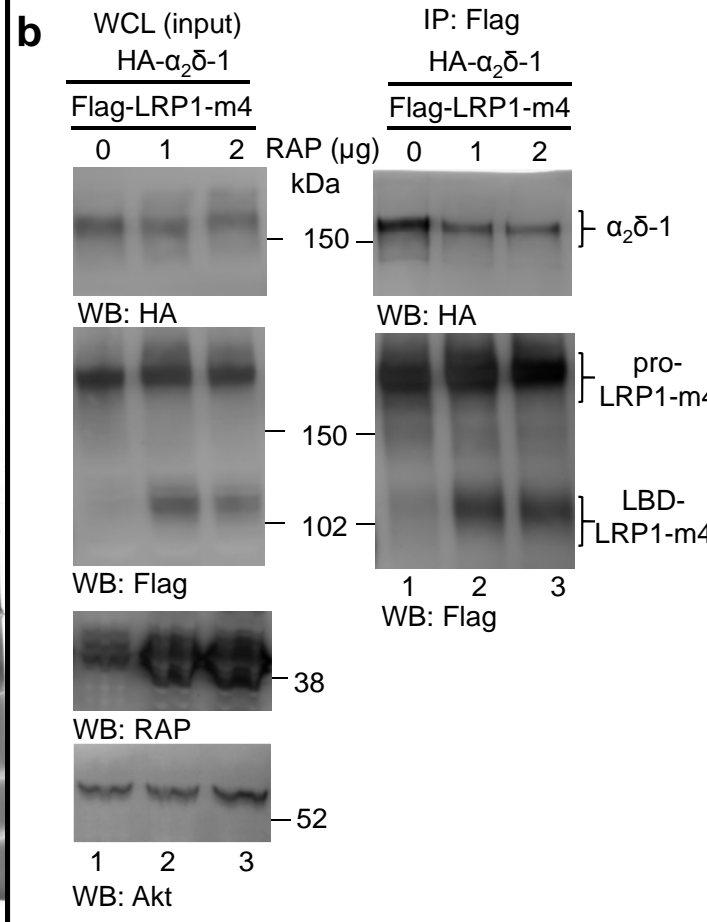

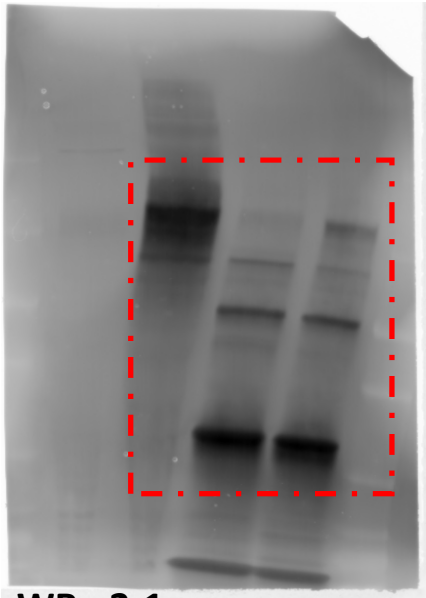

WB a2-1

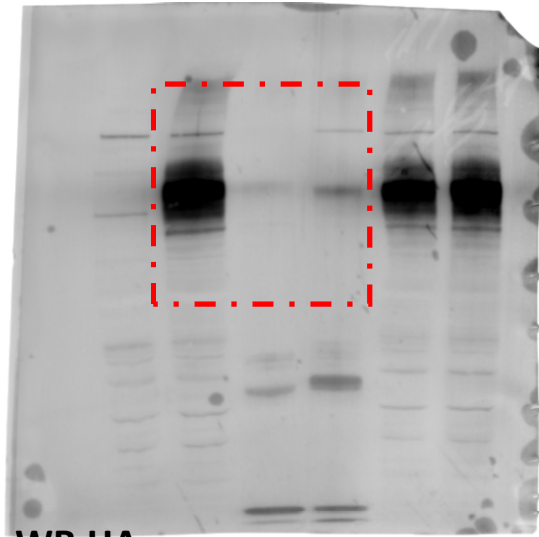

WB HA

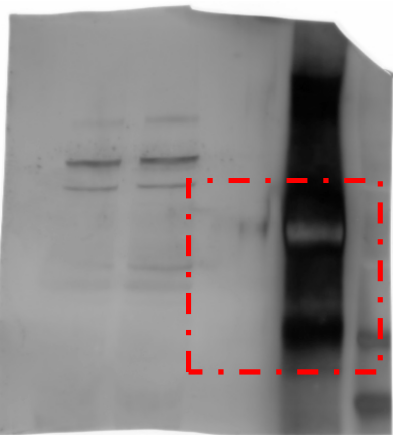

WB: FLAG

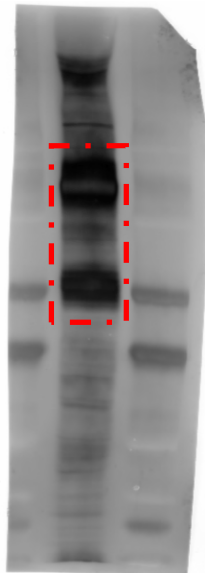

WB: FLAG

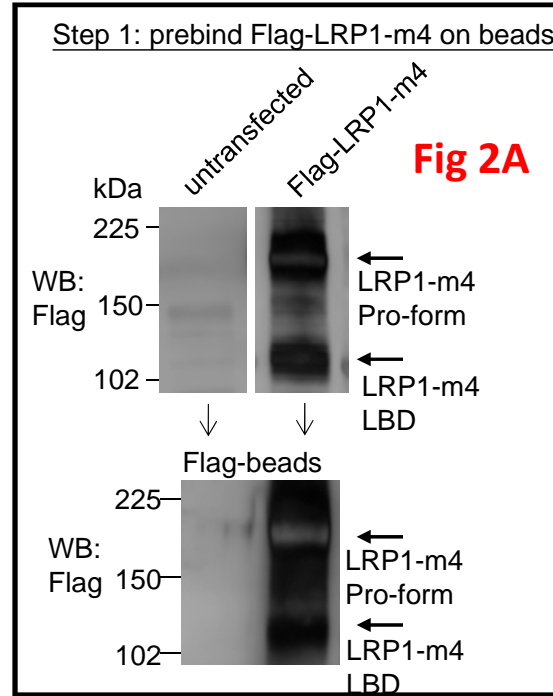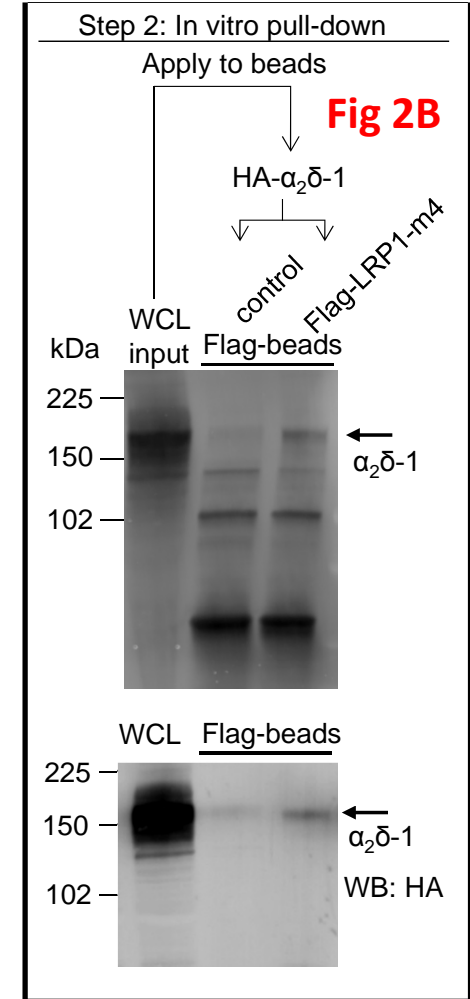

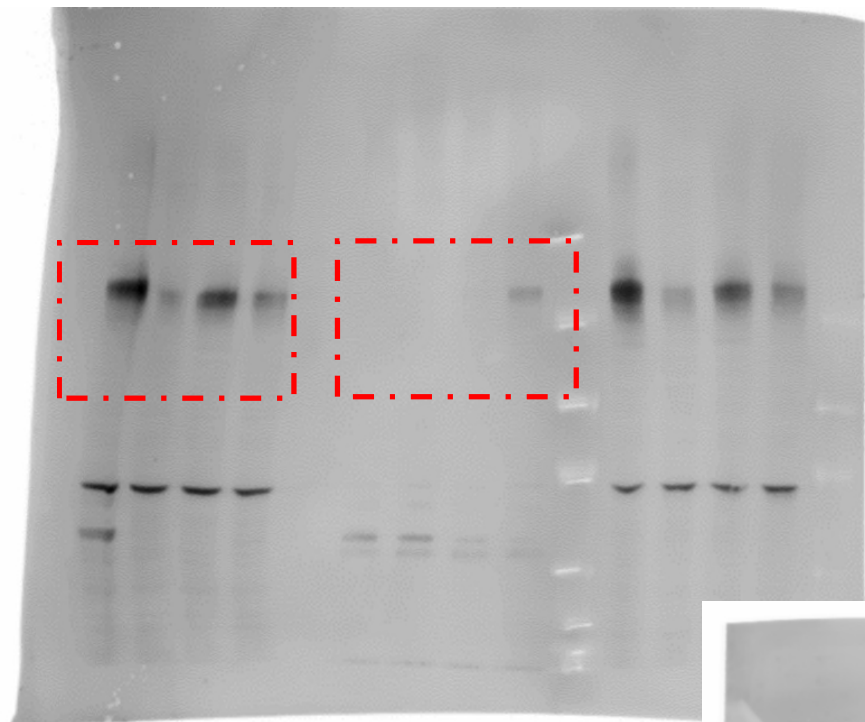

**WB: a2-1**

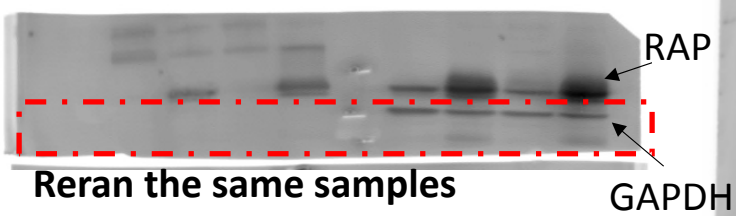

**Reran the same samples  
WB: RAP; Reblot: GAPDH**

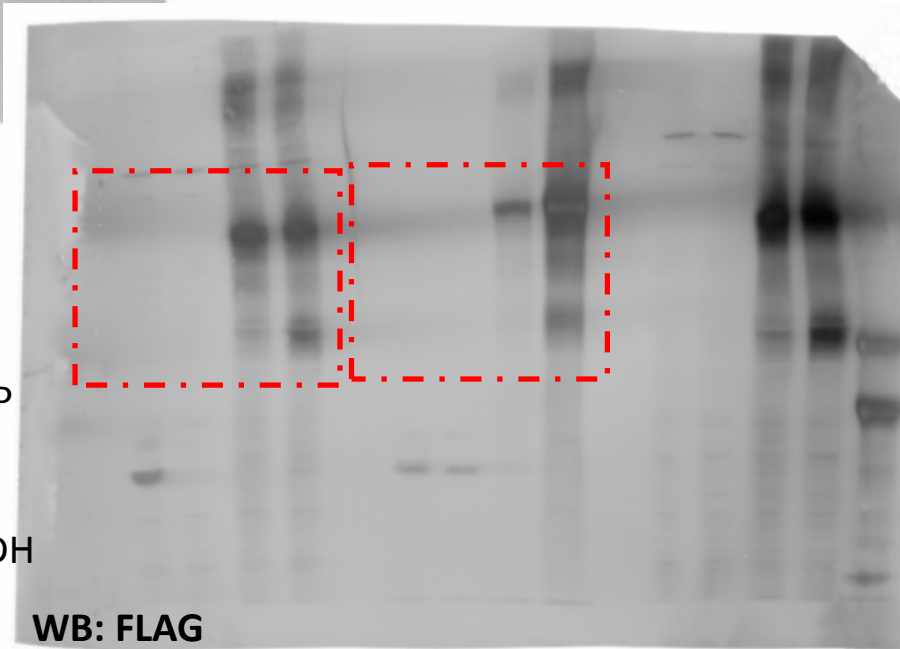

**WB: FLAG**

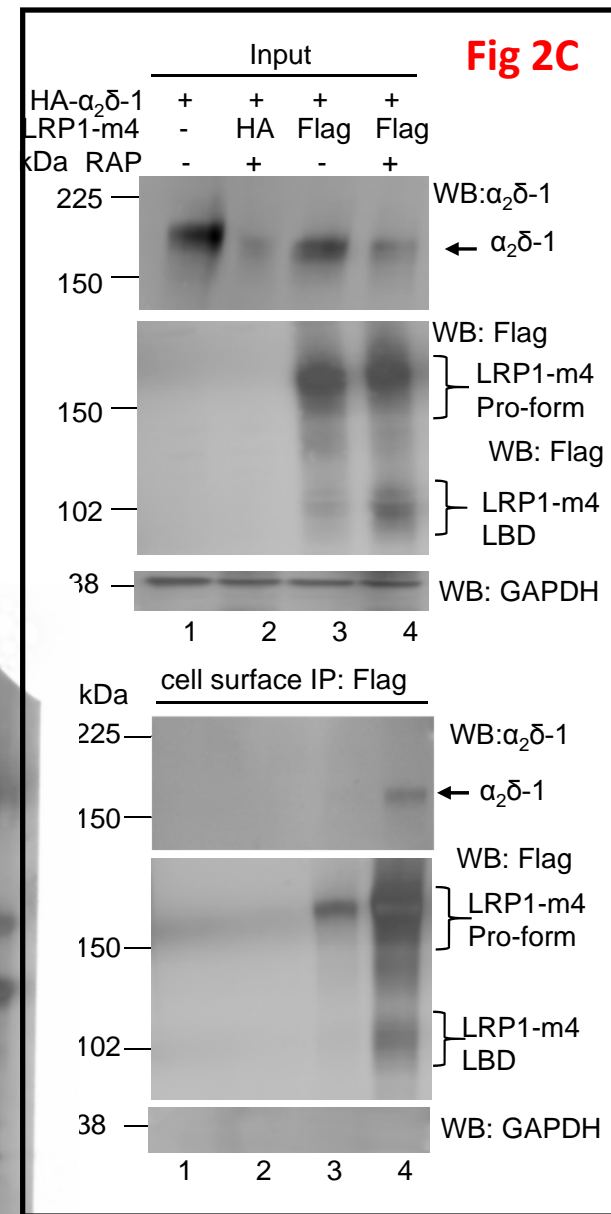

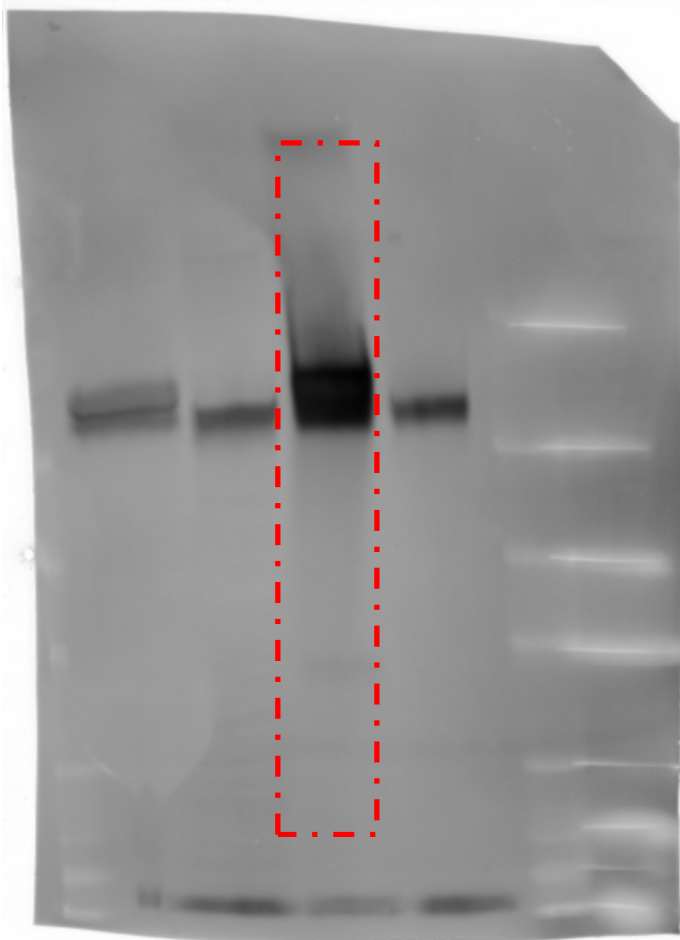

WB: HA

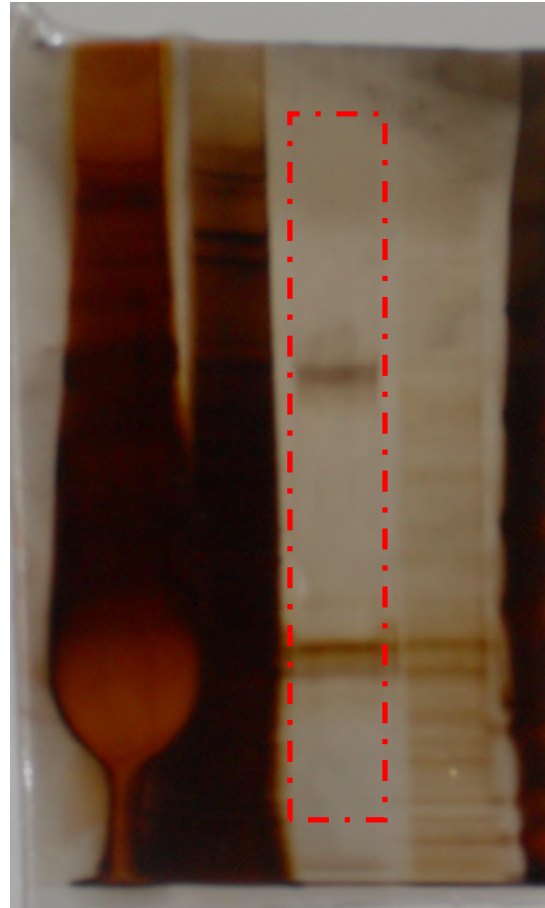

Silver stain

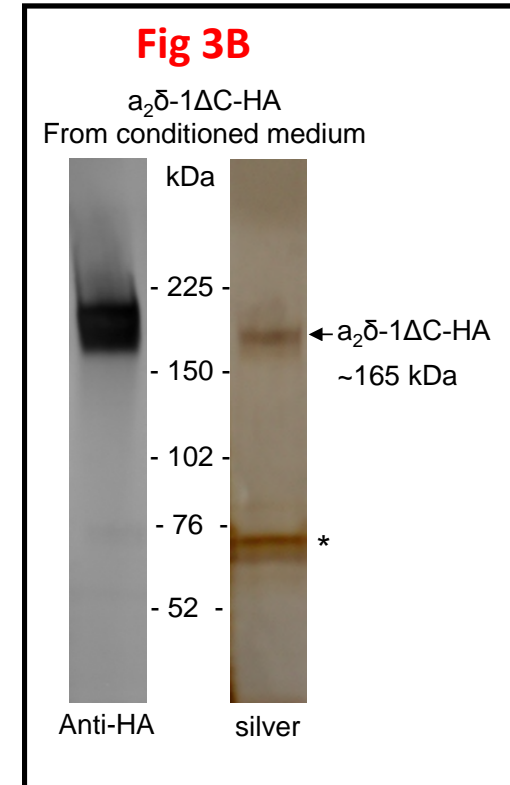

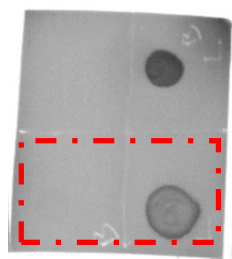

WB: LRP1

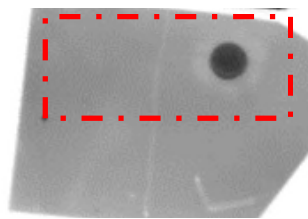

WB: HA

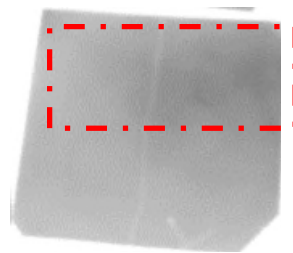

WB: HA

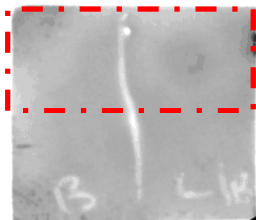

WB: HA

**Fig 3C**

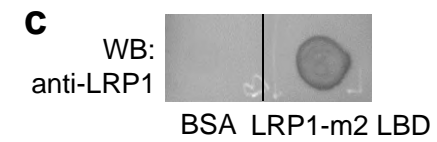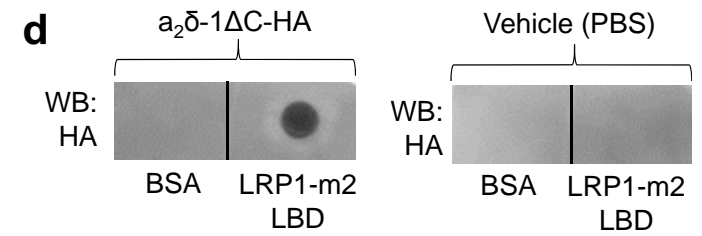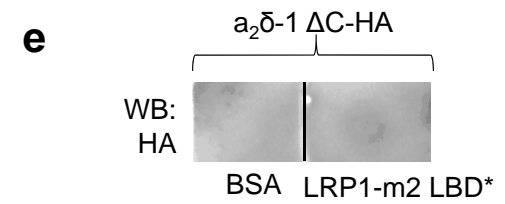

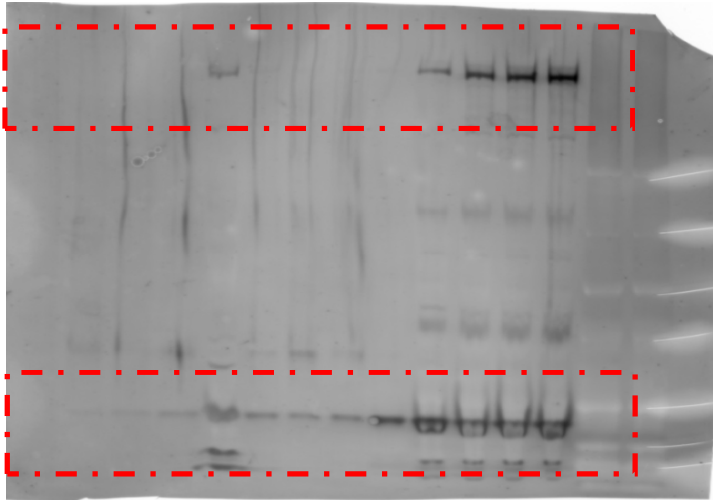

**WB: LRP1 (above) and RAP (below)**  
 same Ab stains both (see Mat & Methods)

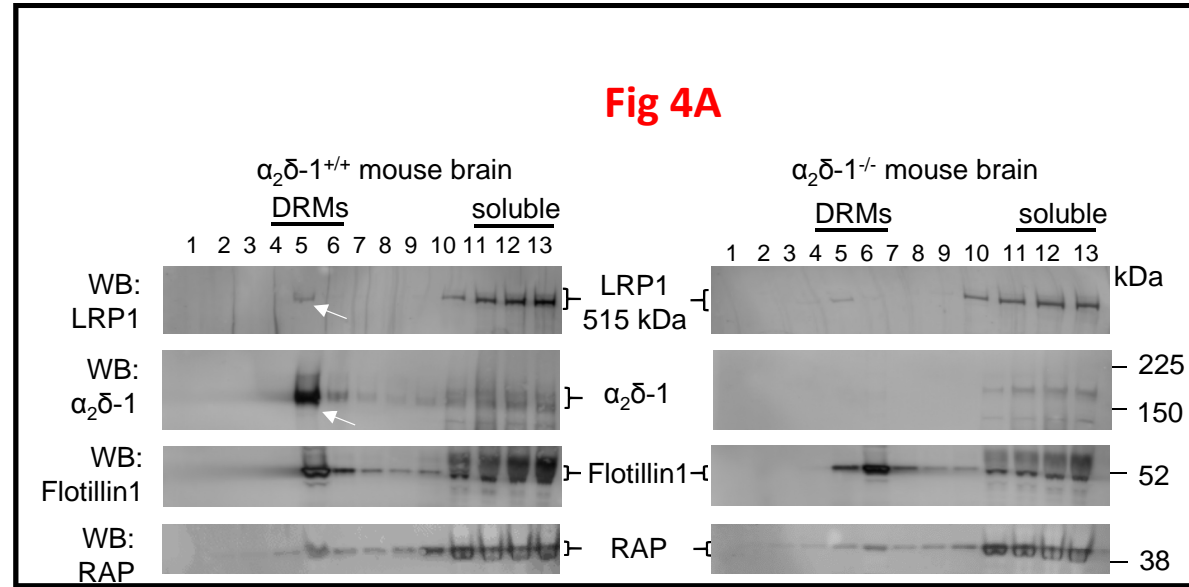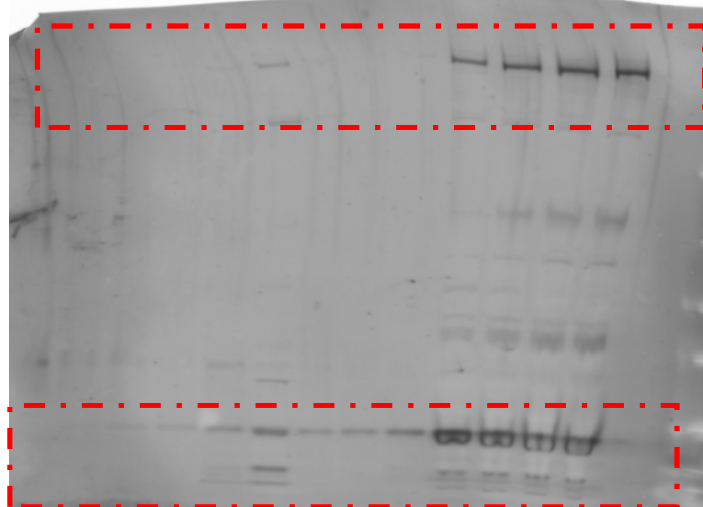

**WB: LRP1 (above) and RAP (below)**  
 same Ab stains both (see Mat & Methods)

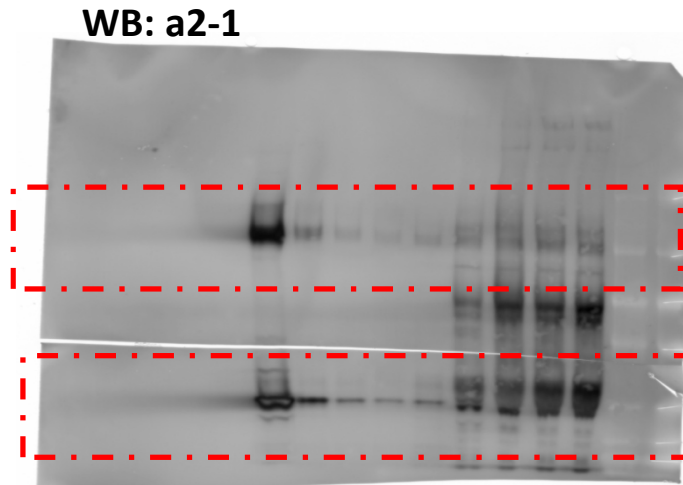

**WB: flotillin 1**

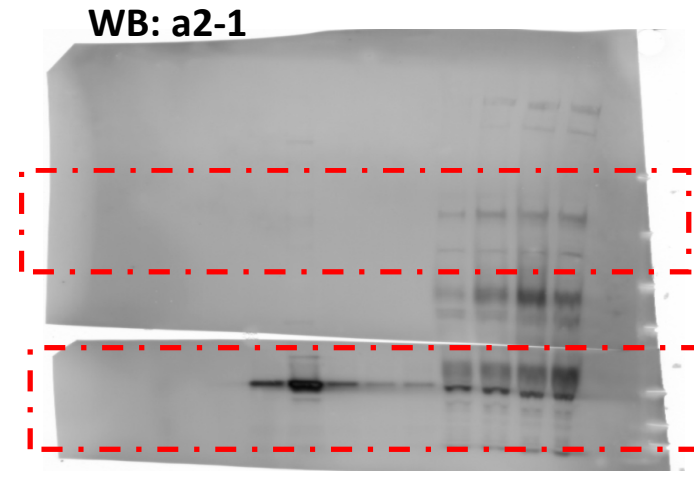

**WB: flotillin 1**



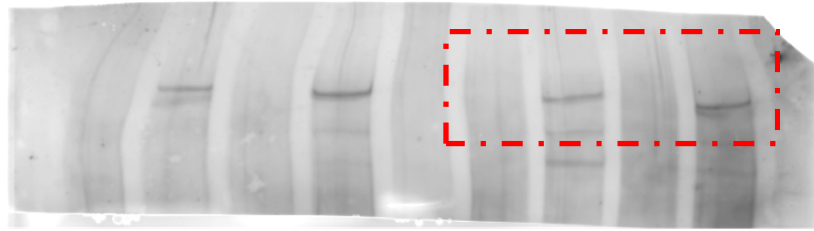

WB: LRP1

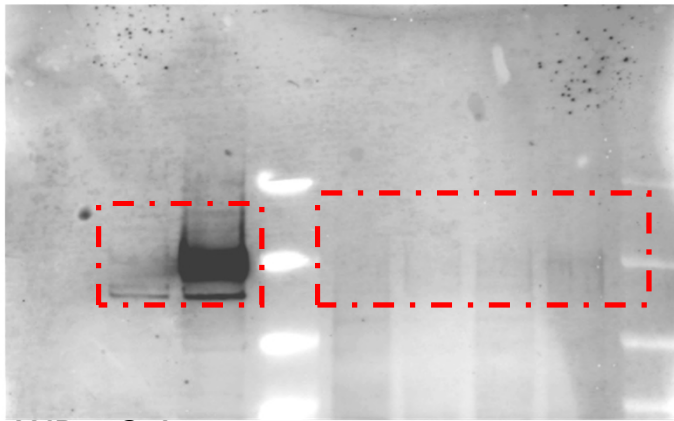

WB: a2-1

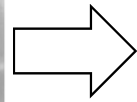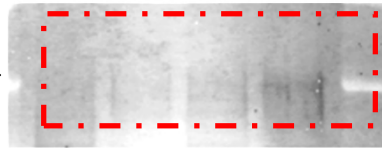

WB: a2-1 (increased contrast)

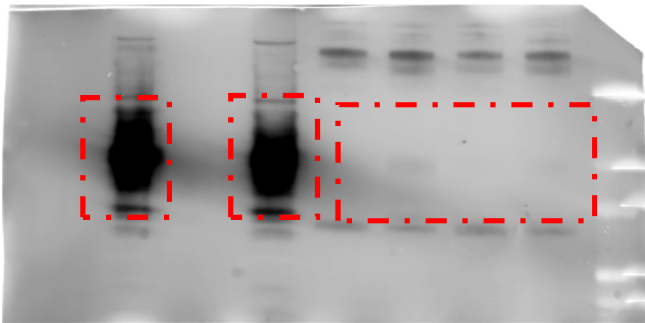

WB: Prp

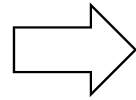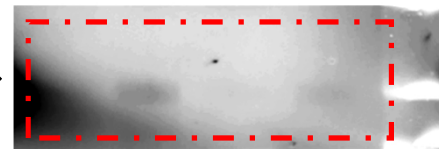

WB: Prp (increased contrast)

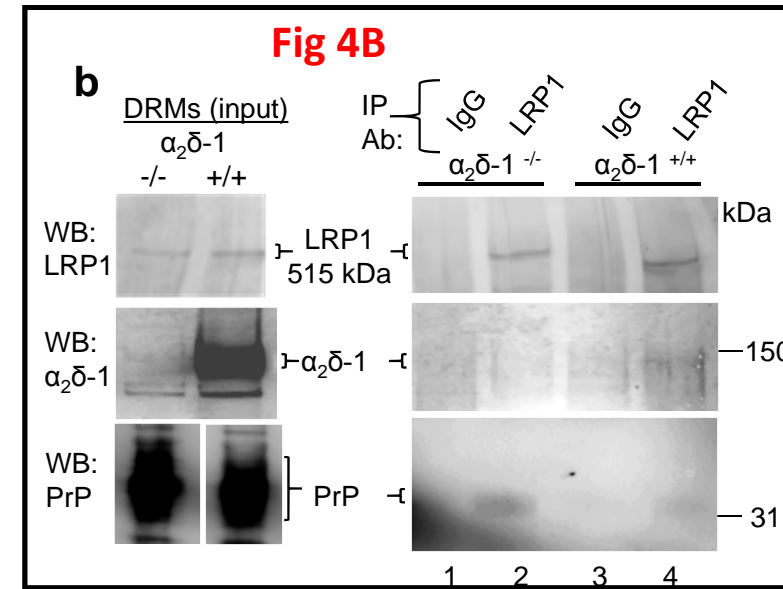

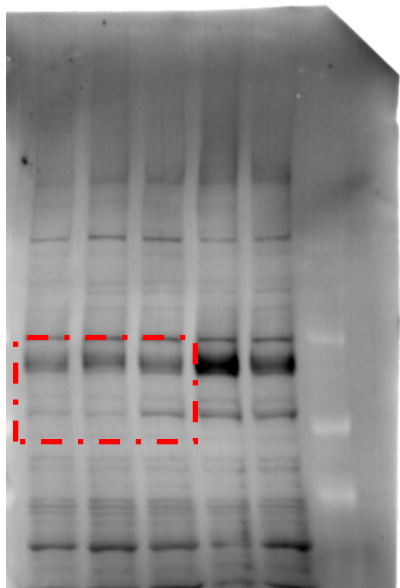

WB: HA

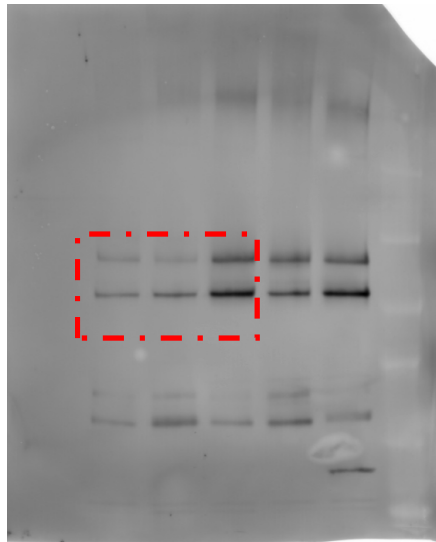

WB: HA

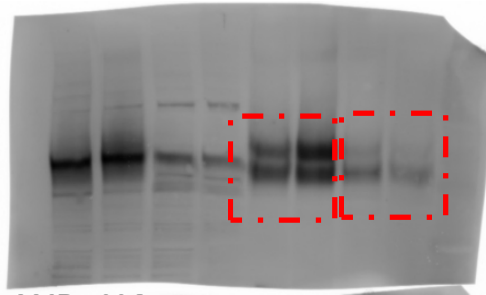

WB: HA

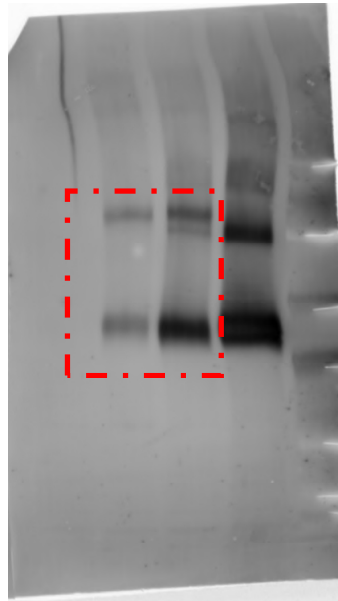

WB: FLAG

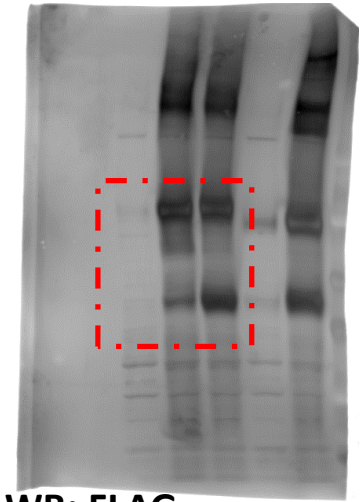

WB: FLAG

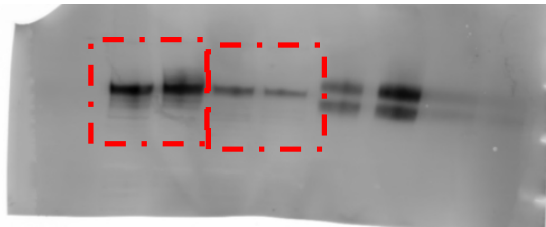

WB: HA

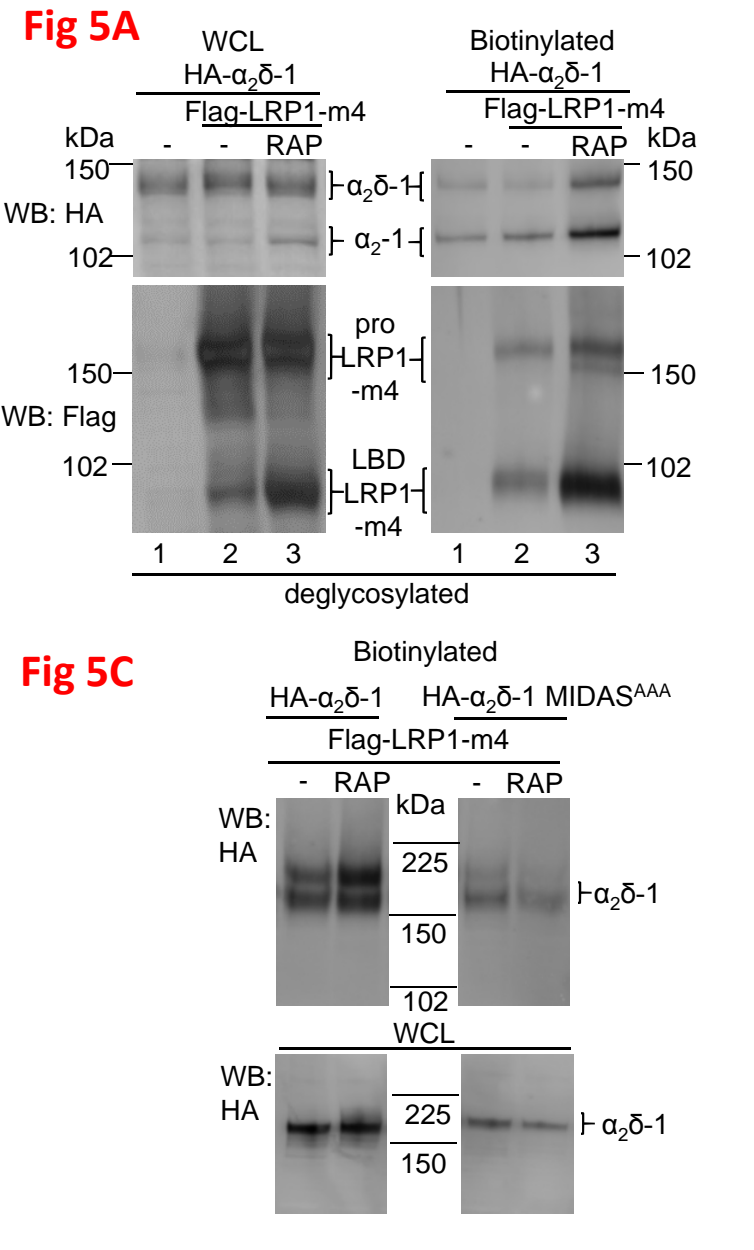

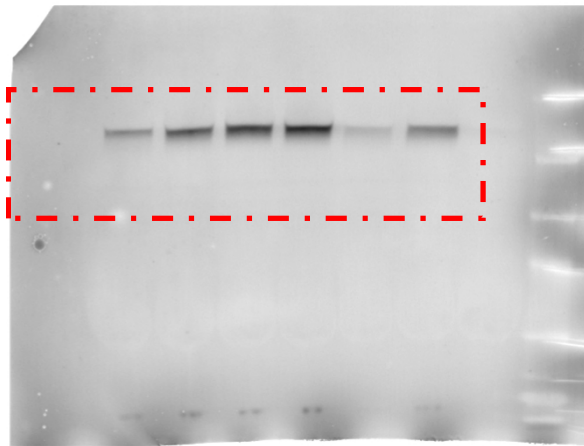

WB: HA

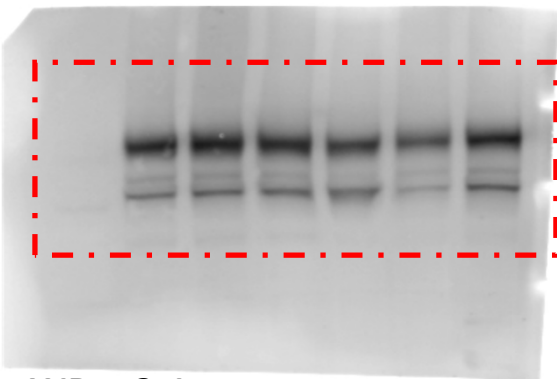

WB: a2-1

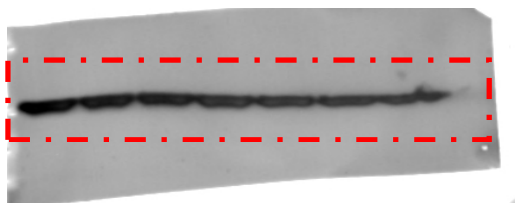

WB:GAPDH

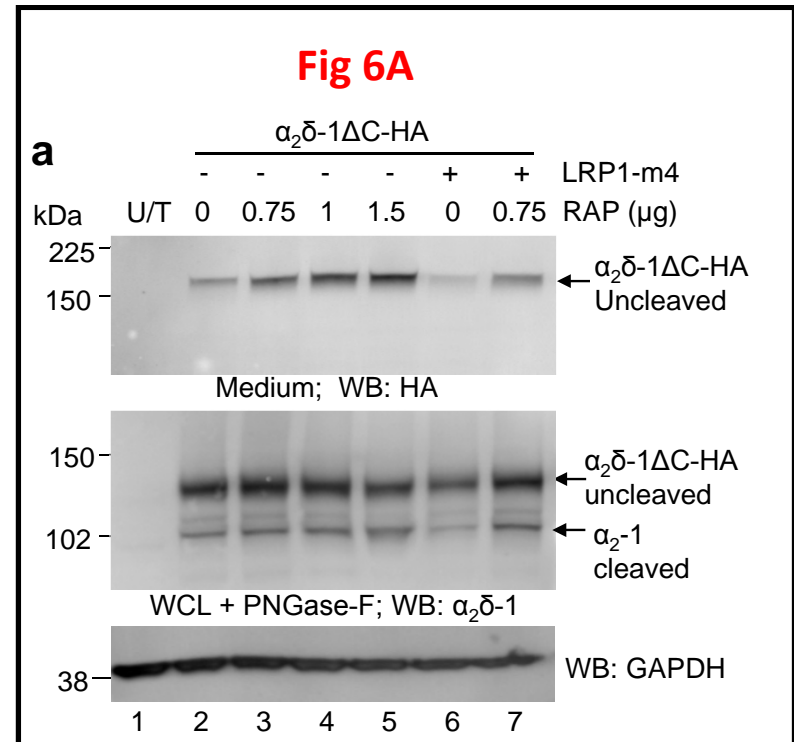

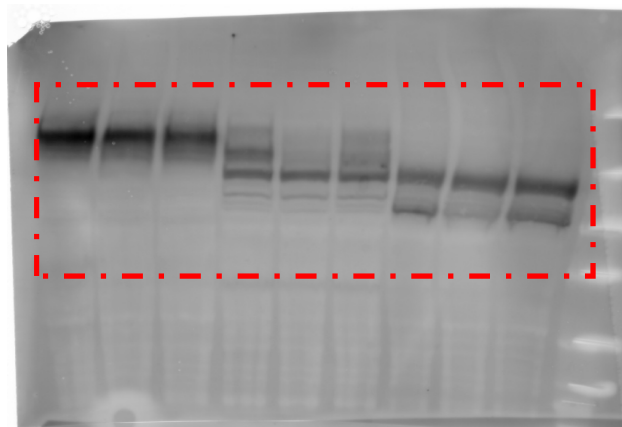

WB: a2-1

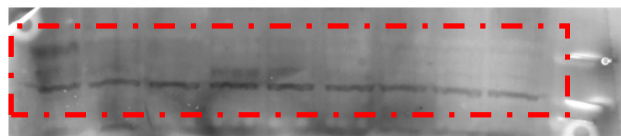

Reblot: Akt

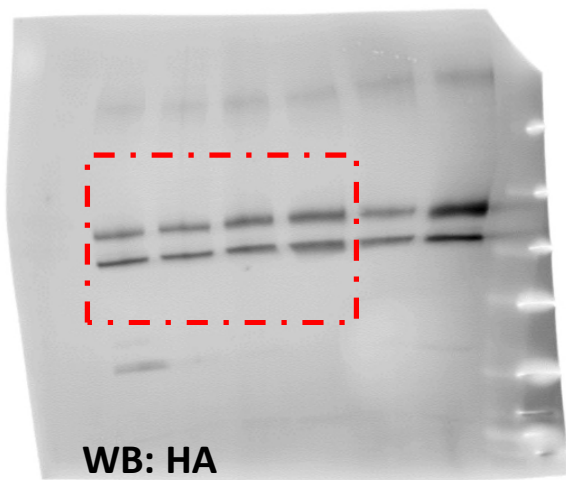

WB: HA

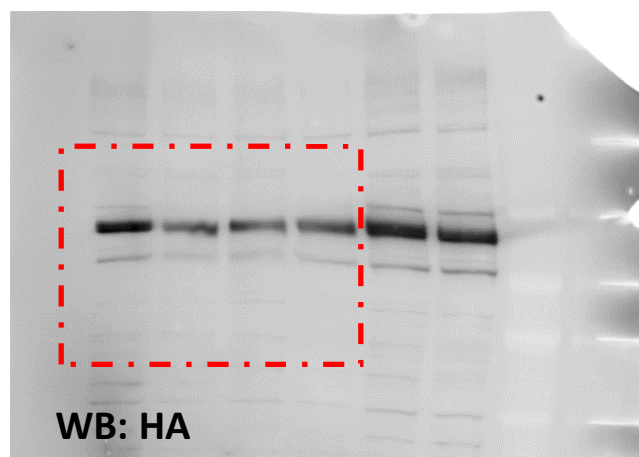

WB: HA

**Fig 7B**

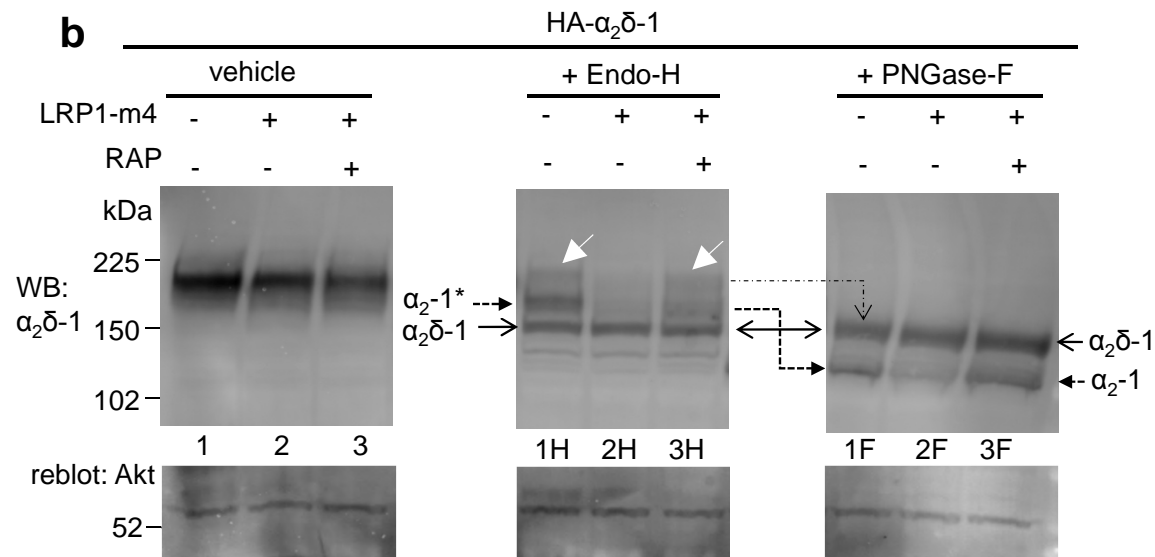

**Fig 9E**

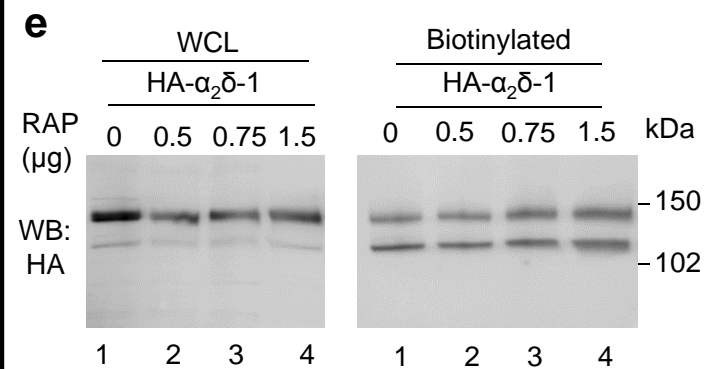

Supplement: srep43802-s1.pdf [file srep43802-s1.pdf]
